# Supplementary material for: Bioactives and Extracellular Enzymes Obtained from Fermented Macrofungi Cultivated in Cotton and Jatropha Seed Cakes
Source: MDPI journal article supplement (doi:10.3390/microorganisms10081670), 2022-08-19
Supplement: s1 [file s1]

## Supplementary material

**Table S1.** Growth rate (mm/day) of macrofungi on Agar-JSC plates, SSF-JSC flasks and CSC-Agar and SSF-CSC flasks

| Fungi     |                                  | Growth-rate (mm/day) $\pm$ SD |                    |                              |                    |
|-----------|----------------------------------|-------------------------------|--------------------|------------------------------|--------------------|
| Code      | Name                             | Agar-JSC<br>(Petri dish)      | SSF-JSC<br>(flask) | Agar-CSC<br>(Petri dish)     | SSF-CSC<br>(flask) |
| INPA 1643 | <i>Stereum sp.</i>               | 3.62 $\pm$ 0.49c              | NG                 | 3.53 $\pm$ 0.57b             | NG                 |
| INPA 1644 | <i>Schizophyllum<br/>commune</i> | 3.70 $\pm$ 0.12c              | NG                 | 3.78 $\pm$ 0.68b             | NG                 |
| INPA 1646 | <i>Coriolopsis sp.</i>           | 7.37 $\pm$ 0.13a              | 2.97 $\pm$ 0.34a   | 6.96 $\pm$ 0.36 <sup>a</sup> | 2.42 $\pm$ 0.28a   |
| INPA 1668 | <i>Trametes sp.</i>              | 3.66 $\pm$ 0.86c              | NG                 | 3.47 $\pm$ 0.24b             | NG                 |
| INPA 1681 | <i>Trametes sp.</i>              | 3.63 $\pm$ 0.24c              | NG                 | 3.70 $\pm$ 0.41b             | NG                 |
| INPA 1689 | <i>Trametes sp.</i>              | 3.66 $\pm$ 0.49 c             | NG                 | 3.91 $\pm$ 0.67b             | NG                 |
| INPA 1690 | <i>Trametes sp.</i>              | 3.67 $\pm$ 0.93c              | NG                 | 3.60 $\pm$ 0.11b             | 1.98 $\pm$ 0.47a   |
| INPA 1694 | NI                               | 3.61 $\pm$ 0.42c              | 2.41 $\pm$ 0.65a   | 3.71 $\pm$ 0.17b             | NG                 |
| INPA 1695 | <i>Trametes sp.</i>              | 3.55 $\pm$ 0.60c              | 2.21 $\pm$ 0.71a   | 3.91 $\pm$ 0.39b             | 2.21 $\pm$ 0.39a   |
| INPA 1696 | <i>Tyromyces sp.</i>             | 3.83 $\pm$ 0.48c              | 2.04 $\pm$ 0.43a   | 3.85 $\pm$ 0.48b             | 2.14 $\pm$ 0.34a   |
| INPA 1698 | <i>Trametes<br/>elegans</i>      | 1.92 $\pm$ 0.31e              | 1.65 $\pm$ 0.74b   | 2.38 $\pm$ 0.78c             | 1.37 $\pm$ 0.17b   |
| INPA 1719 | <i>Trametes sp.</i>              | 3.36 $\pm$ 0.22c              | 1.43 $\pm$ 0.32b   | 3.70 $\pm$ 0.42b             | NG                 |

|           |                                  |                  |                  |                  |                  |
|-----------|----------------------------------|------------------|------------------|------------------|------------------|
| INPA 1720 | <i>Schizophyllum<br/>commune</i> | $3.68 \pm 0.13c$ | NG               | $3.65 \pm 0.00b$ | $2.16 \pm 0.41a$ |
| INPA 1725 | <i>Hexagonia<br/>hydroides</i>   | $3.73 \pm 0.52c$ | $2.40 \pm 0.48a$ | $3.72 \pm 0.72b$ | $1.46 \pm 0.23b$ |
| INPA 1734 | NI                               | $2.79 \pm 0.26d$ | NG               | $3.28 \pm 0.50b$ | NG               |
| INPA 1739 | <i>Flavodon flavus</i>           | $7.04 \pm 0.02b$ | $2.56 \pm 0.48a$ | $7.31 \pm 0.20a$ | $2.34 \pm 0.49a$ |

NI: no-identified, NG: no-growth. Letters next to each metric value correspond to comparisons of the averages in the same column and not between one column and another (Tukey test  $p \leq 0.05$ ). The fungi in bold were selected to continue the work.

**Tabela S2.** Literature results for degradation of phorbol esters in JSC, via solid-state fermentation by macrofungi.

| Fungus                                 | Degradation rate | Fermentation time | Reference                             |
|----------------------------------------|------------------|-------------------|---------------------------------------|
| <i>Pleurotus ostreatus</i>             | 37%              | 15 days           | LUZ et al.,<br>2013                   |
|                                        | 60%              | 45 days           |                                       |
|                                        | 99%              | 60 days           |                                       |
| <i>Pleurotus ostreatus</i>             | 58%              | 15 days           | KASUYA<br>et al., 2012                |
|                                        | 85%              | 30 days           |                                       |
|                                        | 99%              | 45 days           |                                       |
| <i>Pleurotus sapidus</i>               | 76%              | 20 days           | BOSE;<br>KEHARIA,<br>2014             |
| <i>Pleurotus ostreatus</i>             | 72.5%            |                   |                                       |
| <i>Pleurotus florida</i>               | 67.9%            |                   |                                       |
| <i>Pleurotus sajor-caju</i>            | 67.9%            |                   |                                       |
| <i>Ganoderma lucidum</i>               | 100%             | 20 days           | BOSE;<br>KEHARIA,<br>2014             |
| <i>Trametes zonata</i>                 | 100%             |                   |                                       |
| <i>Trametes gibbosa</i>                | 91.7%            |                   |                                       |
| <i>Trametes versicolor</i>             | 89%              |                   |                                       |
| <i>Trametes hirsuta</i>                | 81.6%            |                   |                                       |
| <i>Phanerochaete<br/>chrysosporium</i> | 44.9%            |                   |                                       |
| <i>Phlebia rufa</i>                    | 97%              | 30 days           | BARROS <i>et</i><br><i>al.</i> , 2011 |
| <i>Bjerkandera adusta</i>              | 91%              |                   |                                       |
| <i>Ganoderma<br/>resinaceum</i>        | 20%              |                   |                                       |

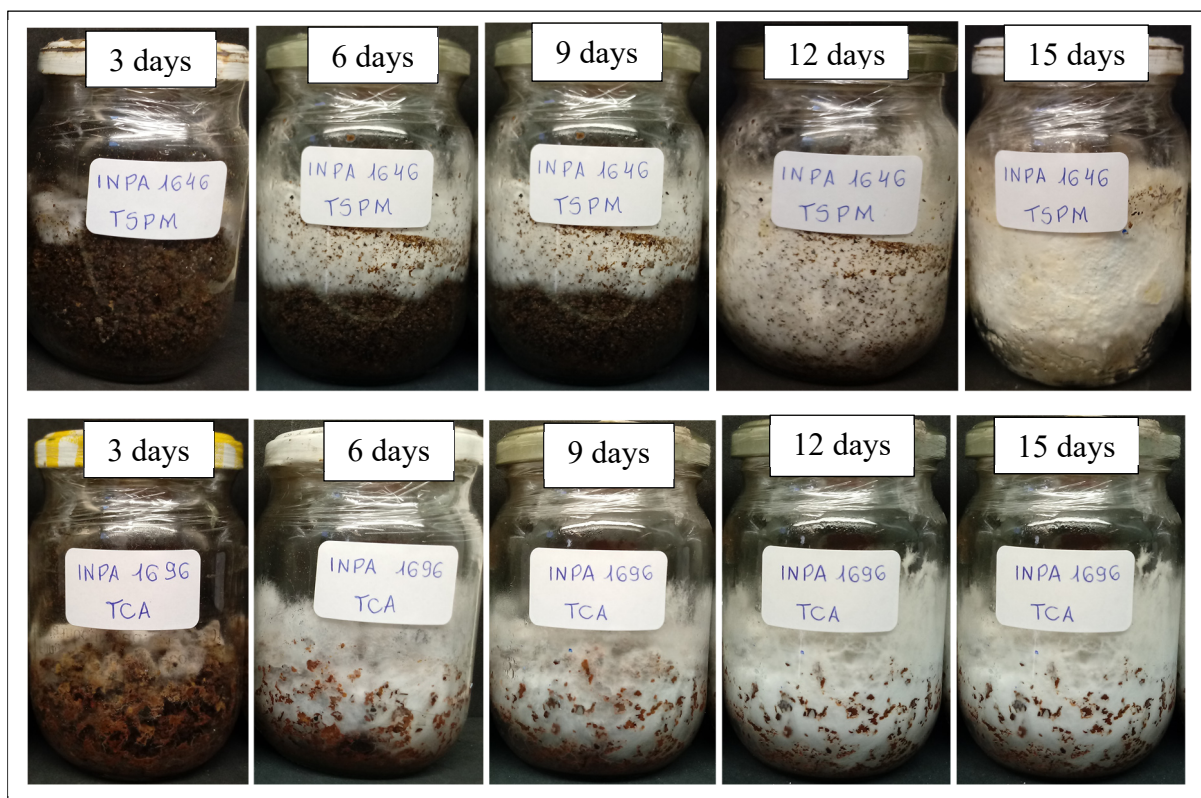

**Figure S1.** Pictures of the glass flasks containing the fermented cakes after 3, 6, 9, 12 and 15 days of incubation at 28°C, to illustrate the level of colonization of JSC and CSC by macrofungi *Coriolopsis sp.* and *Tyromices sp.*, respectively.

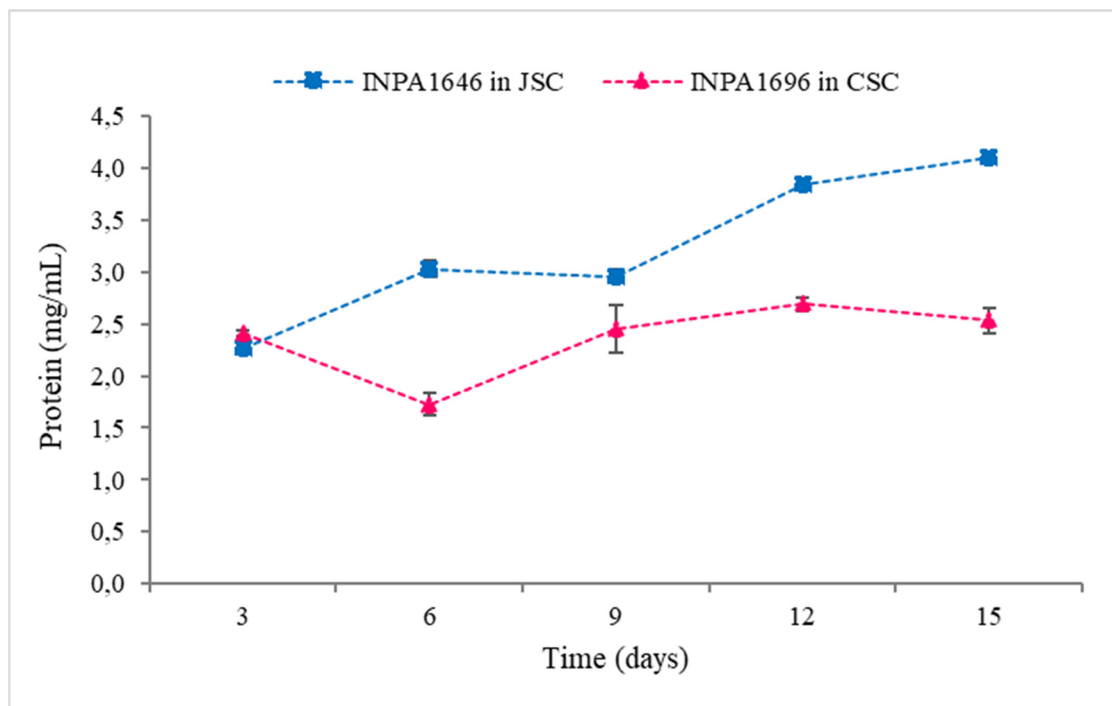

**Figure S2.** Total soluble protein kinetics in the crude extracts of SSF-JSC and SSF-CSC using *Corioliopsis sp.* and *Tyromices sp.*, respectively.

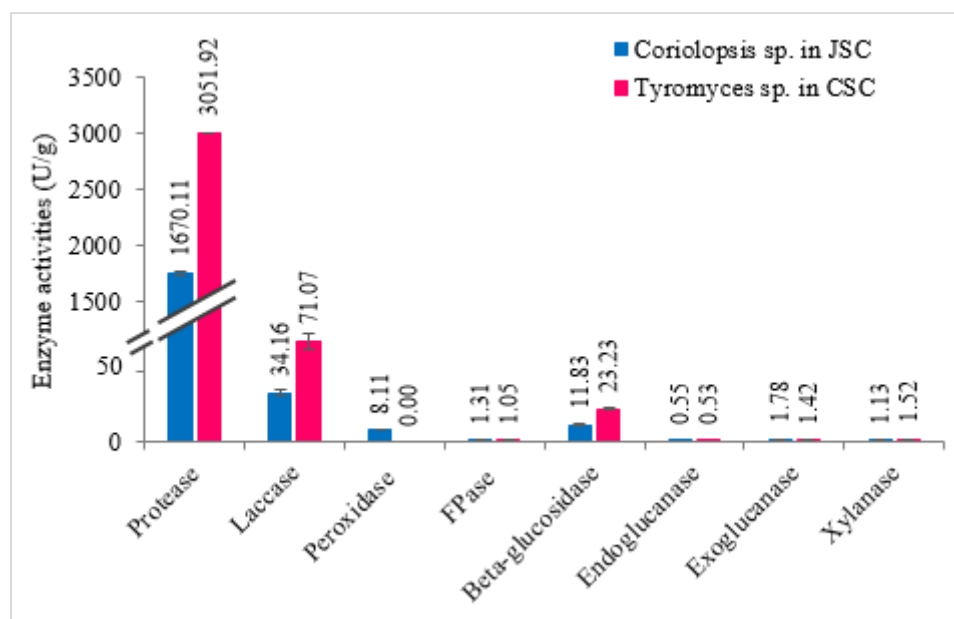

**Figure S3.** Total enzyme activities in the crude extracts of SSF-CSC and SSF-JSC using macrofungi *Tyromyces sp.* and *Coriolopsis sp.*, respectively, after 15 days of fermentation.
